# Supplementary material
Source: PubMed Central journal article supplement (PMC9901199)
Supplement: NIHMS699582-supplement-Supplementary.pdf [file NIHMS699582-supplement-Supplementary.pdf]

## Supplementary Appendix

| Complication                          | ICD (diagnosis)                                                                                                                                                                | ICD (procedure)                                                 | HCPCS/CPT                                                                 | Description                                                                                |
|---------------------------------------|--------------------------------------------------------------------------------------------------------------------------------------------------------------------------------|-----------------------------------------------------------------|---------------------------------------------------------------------------|--------------------------------------------------------------------------------------------|
| Stoma                                 |                                                                                                                                                                                | 46.4                                                            | 44346                                                                     | Repair of parastomal hernia                                                                |
|                                       |                                                                                                                                                                                | 56.52                                                           | 50727, 50728,<br>50830                                                    | Revision ileal conduit                                                                     |
|                                       | E878.3                                                                                                                                                                         |                                                                 |                                                                           | Stoma-related complication                                                                 |
| Hernia                                | 551.9, 552.8,<br>552.9, 553.9                                                                                                                                                  | 53.5, 53.51,<br>53.59, 53.6,<br>53.61, 53.62,<br>53.63, 53.69   | 49560, 49561,<br>49565, 49566,<br>49654, 49655,<br>49656, 49657,<br>49658 | Repair of hernia (abdominal,<br>incisional, surgical-site hernia)                          |
| Wound                                 | 879.2, 998.13,<br>998.3, 998.83                                                                                                                                                | 54.61, 54.62,<br>54.63, 54.72,<br>86.04, 86.05,<br>86.22, 86.28 | 12020, 12021,<br>10180                                                    | Closure of wound disruption;<br>incision and drainage; wound<br>complications              |
| Infection                             | 580.8, 590.80,<br>590.81, 590.00,<br>590.11, 038.0,<br>038.1, 038.2,<br>038.3, 038.4,<br>038.8, 038.9,<br>790.7, 996.64,<br>995.91, 995.92,<br>785.52, 599.0,<br>590.9, 567.22 | 54.91                                                           |                                                                           | Pyelonephritis; sepsis; abscess,<br>percutaneous drainage of<br>abdomen (abscess)          |
| Urinary<br>obstruction                |                                                                                                                                                                                | 55.0, 55.02,<br>55.03, 59.8<br>56.72                            | 50040                                                                     | Nephrostomy; insertion of<br>ureteral stent<br>Revision of urterointestinal<br>anastomosis |
|                                       | 593.3, 593.4,<br>593.5                                                                                                                                                         |                                                                 | 50557, 50575,<br>50576, 50700,<br>52341, 52343,<br>52344                  | Postoperative ureteral stricture;<br>other ureteric obstruction                            |
| Urolithiasis                          | 594.1, 592,<br>592.0, 592.1,<br>592.9                                                                                                                                          | 55.04, 57.19                                                    | 50080, 50081                                                              | PCLN; cystolithotomy; bladder<br>stone                                                     |
| Fistula                               | 593.82, 596.1,<br>596.2, 998.6                                                                                                                                                 |                                                                 |                                                                           | Uretero-intestinal fistula;<br>intestino-vesical fistula;<br>postoperative fistula         |
| Wound infection                       | 686.8, 686.9,<br>728.86, 998.51                                                                                                                                                | 86.04, 86.05,<br>86.22, 86.28                                   | 10180                                                                     | Infection of skin or subcutaneous<br>tissue; nectotizing fasciitis;<br>infected seroma     |
| Renal<br>failure/impairment           | 586, 584                                                                                                                                                                       | 38.95, 39.27,<br>39.95, 54.98,<br>55.6                          | 50360, 50365                                                              | Renal failure; renal dialysis;<br>peritoneal dialysis; renal<br>transplantation            |
| Acidosis,<br>electrolyte<br>imbalance | 276.2, 276.5,<br>276.51, 276.9                                                                                                                                                 |                                                                 |                                                                           | Acidosis, electrolyte disturbance,<br>dehydration                                          |
